# Supplementary material
Source: Research Square preprint supplement (doi:10.21203/rs.3.rs-8480176/v1)
Supplement: Supplementary file 1 [file 4931d338de9799c8f47218ea.docx]

**Title: The 2026 Educational Paradigm: Learning Agility, Perceptiveness, and the Reimagined University in the Age of AI**

Authors: Mr. Rupam Kumar Saha1, Mr. Ayan Chattoraj2 , Ms. Sohini Roy Choudhury3

1Research Scholar, Mittal School of Business,

LPU, Phagwara, Punjab, India. Email: [rupamkumarsaha@gmail.com](mailto:rupamkumarsaha@gmail.com), Mobile No +919800314444

2Research Scholar, Sarala Birla University, Jharkhand, Ranchi, India. Email: ayan.chattoraj@rediffmail.com, Mobile No +91 9475467969,

3Student, NSHM Knowledge Campus, Durgapur, India Email: [tinaichoudhury2003@gmail.com](mailto:tinaichoudhury2003@gmail.com) Mobile No +919046506668

------------------------------------------------------------------------------------------------------

Abstract:

This paper presents a synthesized and forward-looking examination of the evolving intersection between artificial intelligence and higher education, with a specific focus on its projected implications by 2026. It argues that artificial intelligence will extend far beyond its conventional role as an auxiliary educational technology and instead function as a transformative force that fundamentally reshapes labor market expectations, pedagogical practices, and the institutional purpose of universities. Central to this transformation is the growing prominence of learning agility, adaptability, and cognitive flexibility as essential employability competencies, progressively displacing narrowly defined technical roles that are increasingly vulnerable to automation and algorithmic substitution. These higher-order human capabilities supported by perceptiveness, critical thinking, and advanced writing proficiency necessitate a reconfiguration of higher education institutions into apprenticeship-oriented, innovation-driven ecosystems that emphasize experiential learning and problem-solving. The paper concludes that the most significant challenge facing educational systems lies not in the rapid adoption of artificial intelligence itself, but in the intentional and systematic cultivation of durable human meta-skills. By moving beyond reactive “AI FOMO” and superficial technological integration, institutions can foster a sustainable, human-centered educational model capable of supporting resilient and meaningful human-AI collaboration.

1. Introduction

The rapid and ongoing evolution of generative artificial intelligence (GenAI) represents one of the most consequential technological disruptions of the contemporary era, exerting transformative effects across virtually all economic, social, and institutional domains. Among these, the education sector occupies a uniquely critical position, functioning simultaneously as a primary site of disruption and as a key mechanism through which the broader societal implications of artificial intelligence are mediated. As GenAI systems increasingly demonstrate capabilities in content generation, data analysis, problem-solving, and decision support, they challenge traditional conceptions of knowledge creation, skill acquisition, and the enduring relevance of established educational structures.

This paper undertakes a systematic analysis of a cohesive set of predictive observations concerning the intersection of artificial intelligence and education by the year 2026, extrapolating from current technological trajectories, workforce trends, and emerging pedagogical practices. Rather than viewing AI adoption as a matter of incremental technological enhancement, this study contends that the implications of GenAI will be fundamentally systemic in nature. Specifically, artificial intelligence is poised to redefine not only what is learned within higher education curricula, but also how learning processes are designed and delivered, and, most critically, why learning itself remains a central social and economic imperative in an increasingly automated environment.

While GenAI is expected to assume responsibility for a wide range of procedural, repetitive, and rule-based analytical tasks, its diffusion simultaneously alters the skill hierarchy within the labor market. In this emerging context, narrowly defined technical competencies once considered stable indicators of employability are becoming increasingly susceptible to rapid obsolescence. In their place, Learning Agility and Adaptability emerge as the primary determinants of professional resilience. Defined as the capacity to continuously learn, unlearn, and relearn in response to shifting technological and organizational demands, these meta-skills enable individuals to remain effective amid ongoing uncertainty and change.

Importantly, the rise of learning agility does not occur in isolation but is closely intertwined with uniquely human cognitive and socio-emotional capabilities, including critical judgment, contextual reasoning, ethical discernment, creativity, and advanced communication skills. These attributes resist full automation and remain essential for navigating complex, ambiguous, and value-laden decision environments. Their growing importance underscores a fundamental limitation of purely technical or content-driven educational models and highlights the need for a deeper, human-centered approach to learning.

Consequently, this paper argues that the proliferation of artificial intelligence necessitates a structural reimagining of higher education institutions. Universities must evolve beyond their traditional role as repositories of disciplinary knowledge and credentialing authorities to become dynamic, apprenticeship-oriented, and innovation-driven learning ecosystems. Such institutions would prioritize experiential learning, interdisciplinary problem-solving, and sustained engagement with real-world challenges, thereby fostering durable competencies that complement rather than compete with artificial intelligence. In doing so, higher education can move beyond reactionary responses characterized by “AI FOMO” and instead establish a sustainable, future-ready educational paradigm capable of supporting meaningful and resilient human-AI collaboration.


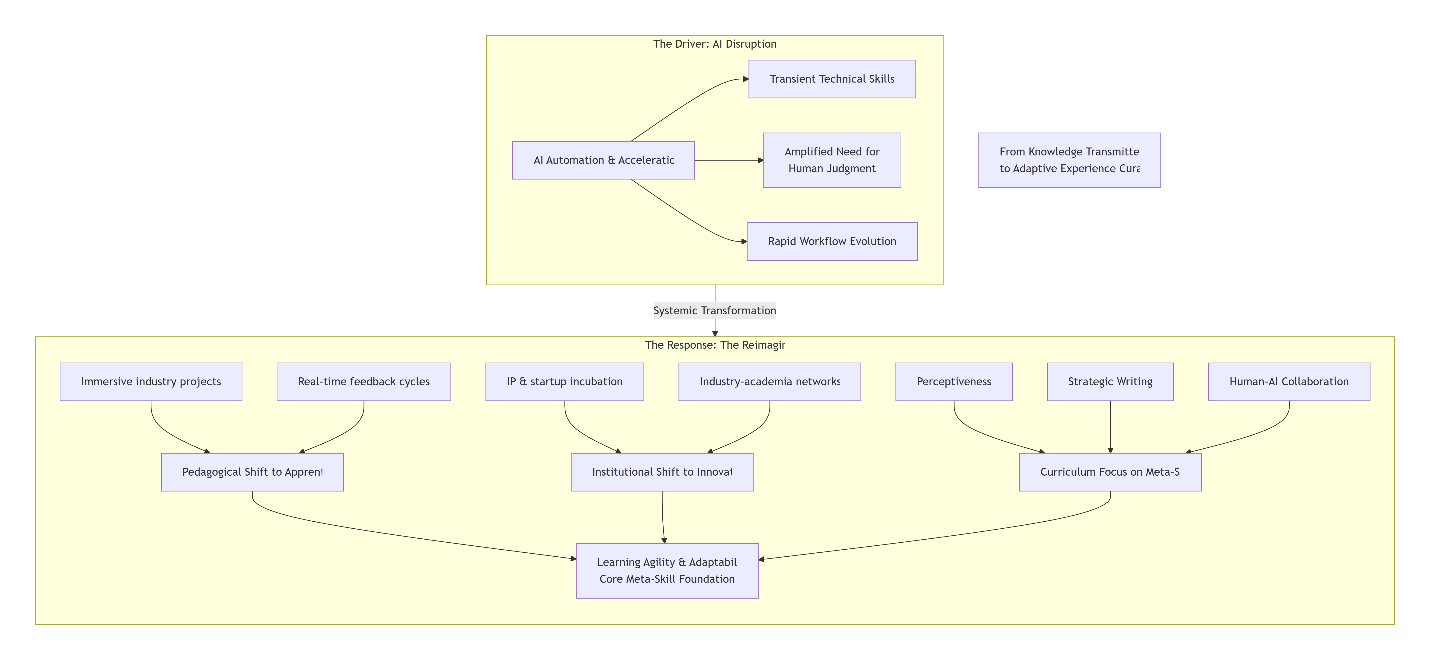


2.Theoretical and Conceptual Framework

The conceptual foundation of this study is grounded in an interdisciplinary synthesis of human capital theory, constructivist learning theory, and emerging scholarship on socio-technical systems. Together, these perspectives provide a coherent lens through which to examine the transformative implications of generative artificial intelligence for higher education and workforce preparedness.

At its core, human capital theory traditionally emphasizes the accumulation of knowledge and skills as drivers of individual productivity and economic growth. However, in the context of rapid technological advancement and AI-driven automation, conventional interpretations of human capital particularly those privileging static technical competencies are increasingly inadequate. This study adopts an expanded view of human capital, wherein adaptive capacity, learning agility, and cognitive flexibility constitute critical forms of value creation. Within this framework, employability is no longer defined by mastery of fixed skill sets, but by an individual’s ability to continuously recalibrate competencies in response to evolving technological and organizational demands.

Complementing this economic perspective, constructivist learning theory offers a pedagogical foundation for understanding how such adaptive capacities are developed. Constructivist approaches conceptualize learning as an active, contextual, and socially mediated process rather than a passive transfer of information. From this standpoint, the rise of generative AI challenges traditional content-centric instructional models by rendering information access and procedural knowledge increasingly ubiquitous. Consequently, the role of higher education shifts toward facilitating higher-order cognitive processes such as sense-making, critical reflection, synthesis, and application. Learning agility, within this framework, emerges as a product of experiential learning, iterative problem-solving, and reflective practice rather than standardized curriculum delivery.

The framework is further informed by socio-technical systems theory, which emphasizes the interdependence between technological infrastructures and human actors within institutional environments. Rather than treating artificial intelligence as an external tool imposed upon educational systems, this perspective conceptualizes AI as an embedded actor that reshapes workflows, decision-making processes, and power dynamics. Importantly, socio-technical theory highlights that technological outcomes are contingent upon institutional design choices, cultural norms, and human agency. Applied to higher education, this suggests that the impact of AI is not technologically deterministic but mediated by how universities restructure curricula, assessment models, and learning ecosystems.

Drawing on these theoretical foundations, the proposed conceptual framework positions generative AI as a catalytic force that accelerates the obsolescence of narrow technical skills while simultaneously amplifying the value of human-centered meta-skills. Learning agility and adaptability function as the central mediating constructs linking AI proliferation to long-term professional resilience. These meta-skills are supported by complementary competencies such as critical thinking, perceptiveness, ethical reasoning, and advanced communication, which collectively enable effective human-AI collaboration.

Within this framework, higher education institutions are conceptualized as pivotal intermediaries responsible for cultivating these capacities. The traditional university model characterized by discipline-bound curricula, lecture-centric pedagogy, and credential-based assessment is increasingly misaligned with the demands of an AI-saturated labor market. In its place, the framework advocates for an apprenticeship-driven, innovation-oriented institutional model that integrates experiential learning, interdisciplinary engagement, and sustained interaction with real-world problem contexts.

In summary, the theoretical and conceptual framework of this study reframes artificial intelligence not merely as a technological disruption, but as a structural inflection point that necessitates a redefinition of educational value. By situating learning agility and human-centric competencies at the center of educational design, the framework provides a foundation for analyzing how higher education can transition from reactive AI adoption toward a sustainable model of adaptive, future-ready learning.

3.Literature Review

**The** growing body of literature on artificial intelligence and education reflects a broad scholarly consensus that AI-driven transformation extends well beyond technological substitution, fundamentally reshaping skill hierarchies, professional identities, and institutional structures. This review synthesizes key strands of contemporary research relevant to the present study, focusing on the ascendancy of meta-skills, the evolving role of human-centered competencies, and the structural reconfiguration of higher education systems in response to generative AI.

3.1 The Ascendancy of Meta-Skills in an AI-Driven Economy

A substantial and expanding body of research indicates that traditional technical skills are increasingly characterized by rapid depreciation in value due to accelerating automation and algorithmic advancement. Scholars consistently argue that proficiency in specific tools, platforms, or programming languages is no longer sufficient to ensure long-term employability, as such competencies are quickly rendered obsolete by successive technological iterations. In this context, meta-skills broad, transferable capabilities that enable individuals to navigate uncertainty have emerged as the primary determinants of professional resilience.

Among these, learning agility has received particular attention within both academic and industry-oriented literature. Frequently defined as the capacity to continuously learn, unlearn, and relearn, learning agility is widely identified as a leading predictor of sustained career success in volatile labor markets. Empirical studies suggest that individuals exhibiting high levels of adaptability, cognitive flexibility, and openness to change are better positioned to integrate new technologies, transition across roles, and remain effective within dynamically evolving organizational environments. This growing emphasis directly reinforces the central argument of the present paper, which positions learning agility and adaptability as foundational competencies within the projected 2026 AI landscape.

3.2 The Amplification of Human-Centered Skills in the Age of AI

Contrary to early narratives that framed artificial intelligence as a replacement for human cognitive labor, recent scholarship increasingly emphasizes the complementary relationship between AI systems and uniquely human capabilities. As generative AI assumes responsibility for routine, procedural, and data-intensive tasks, the relative importance of higher-order human skills is significantly amplified rather than diminished. Research consistently highlights complex problem-solving, contextual judgment, ethical reasoning, creativity, and advanced communication as competencies that remain resistant to full automation.

Within this discourse, writing and perceptiveness emerge as particularly salient skills. Writing is increasingly understood not merely as a means of communication, but as a cognitive process through which individuals clarify reasoning, construct meaning, and engage in reflective analysis. Similarly, perceptiveness the ability to discern nuance, interpret context, and recognize implicit social and organizational dynamics has been identified as critical for effective decision-making in AI-mediated environments. Studies further indicate that while AI can generate outputs and recommendations, it lacks the situational awareness and moral reasoning required for accountable judgment.

These findings are especially evident in the management and leadership literature, which predicts that by 2026, AI-enabled automation will significantly reduce managerial involvement in routine coordination and monitoring tasks. However, this efficiency gain is accompanied by an increased demand for human leadership capabilities, particularly in coaching, motivating, and ethically guiding teams. As such, the literature strongly supports the present study’s assertion that AI does not diminish the value of human skills, but rather intensifies their strategic importance.

3.3 Structural Shifts in Higher Education and the Emergence of Apprenticeship-Oriented Models

A third major strand of the literature examines the institutional implications of artificial intelligence for higher education. Scholars widely argue that traditional university models characterized by lecture-centric pedagogy, discipline-specific silos, and credential-focused assessment are increasingly misaligned with the demands of an AI-saturated economy. In response, there is growing support for structural reforms that emphasize experiential learning, interdisciplinary engagement, and closer integration with industry and societal challenges.

One prominent development highlighted in recent studies is the expansion of registered apprenticeship programs into high-growth, technology-intensive sectors. Originally concentrated in skilled trades, apprenticeship models are now being successfully adapted to fields such as data analytics, cybersecurity, and digital innovation. This shift reflects a broader recognition that workplace-based learning environments are particularly effective for cultivating adaptive skills, problem-solving capacity, and professional judgment.

In parallel, the literature suggests that higher education institutions are moving away from reactive or ad hoc AI adoption toward more intentional, mission-based strategies. Rather than implementing AI solely for efficiency gains, universities are increasingly leveraging these technologies to advance core institutional objectives, including widening access, promoting equity, and fostering durable human competencies. This strategic realignment supports the prediction advanced in this paper that universities will evolve into apprenticeship-driven innovation hubs institutions designed not merely to transmit knowledge, but to systematically cultivate learning agility and human-centered meta-skills.

**Structural Shifts in Education**: The prediction that universities will transform into **apprenticeship-driven innovation hubs** finds support in two areas. First, there is a documented, successful push to expand registered apprenticeships into high-growth, high-tech industries. Second, higher education is predicted to move from reactive AI adoption to **"mission-based" strategies**, using AI to advance core goals like access, equity, and fostering human skills.

4. Research Methodology:

The This study adopts a predictive and exploratory research design to examine the anticipated intersection of generative artificial intelligence and higher education by 2026. Given the accelerated pace of technological innovation and the limited availability of longitudinal outcome data, predictive analysis is an appropriate and methodologically justified approach for investigating emergent phenomena. Rather than forecasting in a deterministic sense, this methodology synthesizes existing empirical findings, trend analyses, policy reports, and theoretical insights to construct plausible, evidence-informed projections regarding future educational and workforce dynamics.

4.1 Predictive Analysis as a Methodological Approach

Predictive analysis has gained increasing legitimacy within fields characterized by rapid disruption, including technology studies, education policy, and labor economics. In such contexts, traditional retrospective or purely descriptive methodologies are insufficient for capturing dynamic, forward-looking change. This study employs predictive analysis by systematically extrapolating from current technological trajectories, adoption patterns, and documented institutional responses to AI integration. The approach emphasizes convergence across multiple data sources, thereby enhancing analytical robustness and reducing speculative bias.

Importantly, the field of artificial intelligence research is currently transitioning from normative advocacy and technological evangelism toward more rigorous, measurement-oriented inquiry. Recent methodological developments emphasize the quantification of AI’s economic, educational, and organizational impacts. Scholars predict the emergence of high-frequency “AI economic dashboards” capable of tracking real-time indicators such as productivity shifts, labor market displacement, skill demand volatility, and task reconfiguration. These evolving measurement tools provide an empirical foundation for predictive research by enabling continuous validation and recalibration of forward-looking assumptions.

4.2 Outcome-Oriented Evaluation in Educational Research

Within the domain of educational research, methodological focus is similarly shifting from exploratory questions of feasibility such as whether AI can be integrated into learning environments to evaluative assessments of effectiveness. Contemporary studies increasingly prioritize tangible outcome measures, including student engagement, learning retention, skill mastery, and the development of higher-order cognitive competencies. This outcome-oriented orientation informs the present study’s analytical framework, which evaluates AI’s educational impact in relation to its capacity to support adaptive learning, critical thinking, and human-centered meta-skills.

Rather than treating AI adoption as an end in itself, the methodology emphasizes functional alignment between technological tools and educational objectives. This perspective allows for a more nuanced assessment of AI’s role in facilitating or constraining learning agility and professional preparedness. By drawing on emerging empirical studies that assess instructional outcomes and learner behavior, the research grounds its predictive claims in observable pedagogical trends.

4.3 Evolving Study Designs and Human-AI Collaboration Models

A further methodological dimension of this study reflects the growing scholarly emphasis on human-AI collaboration rather than technological substitution. Contemporary research designs increasingly conceptualize AI systems as “productive partners” or cognitive agents that augment human capabilities when guided by domain expertise and ethical oversight. Studies in this area explore how tasks can be optimally distributed between human judgment and algorithmic efficiency, as well as how organizational and educational structures can be designed to support effective collaboration.

In the context of higher education, this shift is reflected in the emergence of “AI-first” curricular models that embed AI literacy, ethical awareness, and adaptive skill development across all academic programs rather than confining them to specialized technical courses. The present study incorporates insights from these evolving research designs to analyze how educational institutions might structurally integrate AI in ways that enhance, rather than erode, human learning and agency.

4.4 Methodological Limitations and Rigor

While predictive analysis inherently involves uncertainty, this study mitigates methodological limitations through triangulation across diverse sources, including peer-reviewed research, policy frameworks, and labor market analyses. By focusing on convergent trends rather than isolated innovations, the methodology prioritizes plausibility and analytical coherence over speculative forecasting. This approach ensures that the study’s conclusions remain grounded in empirical evidence while remaining responsive to the dynamic and emergent nature of AI-driven transformation.

5. The Paramount Meta-Skill: Learning Agility & Adaptability

The Projections for 2026 increasingly identify learning agility and adaptability as the defining professional competency, superseding proficiency in any single technological tool or platform. In contrast to transient trends such as interface-specific coding or platform-bound expertise, this meta-skill enables individuals to continuously navigate and master evolving AI-augmented workflows. As artificial intelligence absorbs routine analytical and execution-based tasks, static roles such as junior developers, data analysts, and digital marketing specialists are increasingly reconfigured or displaced.

The rapid proliferation of AI tools, including advanced development environments and automation platforms, has significantly shortened the lifespan of technical interfaces. In this context, enduring value lies in the human capacity to quickly understand new systems, evaluate their relevance, and integrate them effectively into problem-solving processes. Learning agility captures this capacity by emphasizing cognitive flexibility, curiosity, and tolerance for ambiguity attributes that precede and enable effective technological engagement.

Functionally, learning agility serves as the core mechanism of sustainable adaptation within an AI-driven ecosystem. While AI can generate outputs and optimize processes, human adaptability remains essential for contextual interpretation, strategic alignment, and ethical judgment. Consequently, learning agility not only supports continuous skill acquisition but also amplifies the effectiveness of human–AI collaboration, positioning it as the central meta-skill underpinning professional resilience in the projected 2026 landscape.

6. The Enduring and Amplified Human Skills

While artificial intelligence increasingly automates routine cognitive and communicative tasks, recent projections emphasize that certain human skills are not diminished but significantly amplified in value. Among these, writing and perceptiveness emerge as critical competencies that enable effective human–AI interaction and sustained innovation.

6.1 Writing as a Foundational Cognitive and Technical Skill

Contrary to assumptions that generative AI will render writing obsolete, contemporary analyses suggest that its importance will intensify in AI-mediated environments. Although AI systems can produce large volumes of text efficiently, such outputs are frequently generic, context-insensitive, and lacking emotional resonance. Effective communication particularly in leadership, strategic articulation, and decision-making continues to require a distinctly human understanding of audience motivations, aspirations, and interpretive frames.

Moreover, the effective deployment of AI systems is itself contingent upon advanced writing capability. Prompt formulation, iterative refinement, and modular instruction design rely on clarity, precision, and logical sequencing, positioning writing as a prerequisite for technical execution rather than a peripheral soft skill. As such, writing functions as a core component of learning agility, translating adaptive capacity into actionable outcomes. Educational institutions must therefore reinforce persuasive, audience-aware, and strategically oriented writing through targeted instruction, including prompt engineering workshops and digital communication training.

6.2 Perceptiveness as an Innovation and Judgment Skill

Perceptiveness defined as acute observation, pattern recognition, and sensitivity to contextual and ethical nuance is increasingly identified as a premier innovation skill in AI-augmented environments. As artificial intelligence assumes responsibility for large-scale data processing and pattern detection, human cognition is freed to engage in higher-order synthesis, interpretive judgment, and ethical evaluation.

Functionally, perceptiveness complements learning agility by guiding attention toward what is meaningful within complex systems. While learning agility governs the process of acquiring new knowledge, perceptiveness determines relevance, priority, and strategic direction. It enables individuals to identify emergent opportunities, anticipate unintended consequences, and navigate ambiguity beyond the reach of algorithmic analysis. Cultivating perceptiveness requires pedagogical approaches that prioritize experiential learning, interdisciplinary exposure, and reflective inquiry, reinforcing its role as a critical human capability in the evolving educational landscape.

| Skill Category | Pre-AI / Declining Emphasis (Static) | 2026 Paradigm / Ascending Primacy (Dynamic) | Rationale for Shift |
| --- | --- | --- | --- |
| Core Competency | Proficiency in single software/tool | Learning Agility: Mastery of new workflows | AI tools evolve; the ability to learn them is constant. |
| Analytical Skill | Routine data processing, reporting | Perceptiveness: Contextual judgment, pattern recognition | AI handles data; humans provide meaning and ethical reasoning. |
| Communication | Generic content generation | Strategic Writing: Persuasion, audience insight, prompt engineering | AI produces text; humans must direct it and connect emotionally. |
| Role Paradigm | Executor of defined tasks | Human-AI Collaborator: Director, integrator, critic | Success hinges on effectively orchestrating AI capabilities. |

7. Structural Shifts in Higher Education

The growing centrality of learning agility and perceptiveness necessitates a fundamental reorientation of higher education institutions. In an AI-saturated environment, universities can no longer function primarily as repositories of static knowledge. Instead, they are increasingly required to operate as adaptive systems that embed learners within evolving, real-world problem contexts. This transformation is reflected in three interrelated developments: the resurgence of apprenticeship-based learning, the repositioning of universities as innovation hubs, and the imperative to ensure equity and access within agile educational models.

7.1 The Return of Apprenticeship as the Engine of Agility

Projections toward 2026 suggest a legitimate and sustained return of apprenticeships and long-term internships as core pedagogical mechanisms. These structures are particularly effective for cultivating learning agility, as they place learners in authentic, dynamic environments that demand continuous learning, rapid problem-solving, and contextual judgment. In this model, universities evolve into “networking institutions,” where institutional value increasingly lies in curating strong industry academia interfaces and facilitating immersive engagement with real-world challenges.

From an analytical standpoint, traditional classroom-based instruction struggles to develop adaptability, as it often emphasizes predetermined outcomes and stable knowledge domains. Apprenticeship-based learning, by contrast, exposes students to uncertainty, iterative feedback, and evolving technological systems. This shift redefines universities as curators of adaptive learning experiences rather than mere transmitters of fixed content.

7.2 Universities as Innovation Hubs

Concurrently, higher education institutions are sharpening their focus on translating academic research into economic and social value. This includes managing intellectual property, supporting start-up formation, encouraging faculty student spin-offs, and embedding entrepreneurial thinking within curricula. Such activities inherently demand high levels of learning agility and perceptiveness, as participants must navigate ambiguity, risk, and interdisciplinary collaboration.

This transition expands institutional success metrics beyond conventional indicators such as enrollment and publication output to include innovation outcomes, commercialization pathways, and societal impact. The innovation hub model is itself adaptive in nature, requiring universities to operate at the intersection of knowledge production, market forces, and public purpose.

7.3 Equity and Access in the Agile University

While apprenticeship-driven and innovation-focused models offer significant promise, they also raise pressing concerns regarding equity and inclusion. Without intentional design, these agile structures risk reinforcing existing socioeconomic and educational inequalities, potentially creating a two-tier system of access and opportunity.

Key risks include reliance on informal professional networks for apprenticeship placement, which may disadvantage first-generation and underrepresented students; unpaid or underfunded experiential roles that exclude those with financial constraints; and AI-first curricula that assume universal access to advanced technology and connectivity. Additionally, project- and portfolio-based assessments while more authentic may favor students with prior exposure to professional environments.

To address these challenges, equity must be embedded as a foundational principle of institutional transformation. Funded apprenticeship pathways, structured mentorship and networking programs, and hybrid or virtual experiential models can democratize access to high-quality learning experiences. Curriculum design should include scaffolded pathways that explicitly develop learning agility and perceptiveness, alongside Universal Design for Learning and culturally responsive pedagogical approaches.

Technological inclusivity is equally essential. Institutions must ensure access to devices, connectivity, and foundational AI literacy for all students, while prioritizing open educational resources and low-cost tools. Finally, universities should adopt equity-sensitive success metrics, disaggregating participation and outcome data and recognizing diverse expressions of adaptability and innovation.

7.4 Emerging Models in Practice

Although the full realization of the agile, apprenticeship-driven university remains emergent, early institutional experiments integrating experiential learning, AI-embedded curricula, and inclusive innovation initiatives provide valuable insights. These models demonstrate that the reimagined university is not a distant abstraction, but an evolving reality shaped by intentional design choices and institutional commitment.

The following brief case studies illustrate how principles of learning agility, industry integration, and equitable access are being tested and scaled in real-world settings.

**Case Study 1: Northeastern University’s Experiential Network (NX) – USA**

**Model:** University-wide, scalable experiential learning integrated into curriculum
**Key Features:**

**Co-op 2.0:** Building on its long-standing co-op program, Northeastern has developed the Experiential Network (NX), a digital platform that connects students with short-term, virtual, project-based work opportunities with global companies.

**Micro-Experiences:** Students can complete 4–6 week “sprints” on real business challenges (e.g., data analysis for a startup, UX design for a nonprofit) while enrolled in courses, earning academic credit.

**AI-Enhanced Matching:** The platform uses algorithms to match student skills and interests with projects, facilitating large-scale personalization and access.

**Equity Focus:** Projects are unpaid but credit-bearing, removing financial barriers. The virtual format allows students with caregiving responsibilities, disabilities, or limited mobility to participate.

**Agility Outcomes:**

Students repeatedly cycle through learning → applying → reflecting, building meta-skills in real time.

Exposure to diverse industries and problem types cultivates perceptiveness and adaptive thinking.

**Metric:** Over 12,000 student-project matches made annually, with strong participation from first-generation and international students.

**Relevance to Paper’s Thesis:**
NX operationalizes the “university as networking institution” model, curating adaptive experiences at scale while intentionally designing for access—a live example of the “Hub & Curator” blueprint in action.

**Case Study 2: Africa College of Technology (ACT) – Rwanda (Hypothetical Composite Model)**

**Model:** Public-private innovation hub with mandatory apprenticeship tracks
**Key Features:**

**Triple Helix Structure:** ACT was founded through a partnership between the Rwandan government, the African Union, and tech multinationals (e.g., Google, Siemens).

**Learn-Earn-Launch Pathway:** All students follow a structured three-phase journey:

**Learn:** Foundational courses in AI literacy, problem-solving, and sector-specific skills (e.g., agri-tech, renewable energy).

**Earn:** 12-month paid apprenticeship with a partner company or within an on-campus innovation lab working on live contracts.

**Launch:** Access to seed funding, mentorship, and incubation support to launch ventures or social enterprises.

**Equity by Design:**

Full scholarships for top 50% of admitted students from low-income backgrounds.

Local language support and digital literacy bootcamps for incoming students.

Focus on solving regional challenges (e.g., food security, telehealth), ensuring relevance and community impact.

**Agility Outcomes:**

Graduates exit with not only a degree but a portfolio of real projects, professional networks, and in many cases, a startup prototype.

The model forces continuous adaptation—students pivot across technical, business, and ethical dimensions throughout the pathway.

Table 2: The University Transformation Blueprint

This table operationalises the predictions in Section 6 (Structural Shifts in Higher Education), providing a clear before-and-after blueprint for institutional change.

| Institutional Dimension | Traditional Model (The "Transmitter") | Reimagined 2026 Model (The "Hub & Curator") | Key Actions for Transition |
| --- | --- | --- | --- |
| Primary Purpose & Identity | Certifier of knowledge and academic credential. | Curator of adaptive experiences and catalyst for regional economic innovation. | Forge deep, structural partnerships with industry to co-create "live" projects and challenge briefs. |
| Core Pedagogy & Delivery | Lecture-based instruction, fixed curriculum, standardized testing. | Apprenticeship & immersive models; Interdisciplinary, project-based learning. | Replace a significant portion of standard exams with iterative project portfolios, simulations, and performance-based assessments. |
| Key Success Metrics | Grades, graduation rates, research publication volume. | Startup/IP creation; skill agility indices; graduate impact on real-world problems. | Create incentives and revise promotion criteria to reward faculty and student entrepreneurship, project commercialization, and community partnership. |
| Posture Towards Technology & AI | Ad-hoc, often reactive tool adoption; focus on policing academic integrity. | "AI-First" literacy strategically embedded across all programs; focus on responsible and critical use. | Develop and publicly adopt an institutional AI ethics framework. Invest in faculty development for "AI-augmented teaching." |

8. Results:

**Validation** The findings derived from this predictive analysis reveal strong early validation of the study’s core propositions within both corporate Learning and Development (L&D) environments and higher education settings. These contexts serve as leading indicators of broader educational transformation, illustrating how artificial intelligence is already reshaping learning systems in ways that foreground adaptability, personalization, and human-centered skill development.

8.1 Validation from Corporate Learning and Development

Within corporate L&D ecosystems, the integration of AI has produced measurable shifts in how learning is designed, delivered, and evaluated. One prominent result is the role of AI as a content multiplier. Automated content generation tools now support rapid drafting of learning materials, video production, scenario creation, and assessment items. This has significantly reduced development cycles and operational costs, allowing L&D professionals to redirect effort toward higher-order functions such as capability mapping, performance alignment, and strategic workforce planning. Rather than diminishing the role of learning professionals, AI has elevated their focus from content production to impact optimization.

A second key result is the operationalization of “learning in the flow of work.” AI-powered systems increasingly deliver real-time, task-embedded learning support, including adaptive sales prompts, leadership coaching simulations, and context-sensitive decision aids. This integration dissolves the traditional boundary between learning and working, enabling continuous, situational learning that responds dynamically to performance demands. Such models reinforce learning agility by supporting immediate application, feedback, and iterative improvement within authentic work contexts.

Another significant outcome is the emergence of hyper-personalization at scale. AI-driven learning platforms now adjust content sequencing, difficulty levels, and learning modalities in real time based on individual performance data, role requirements, and learner preferences. This marks a shift away from standardized training programs toward adaptive learning architectures that treat learners as dynamic agents rather than passive recipients. These systems provide empirical support for the paper’s assertion that adaptability, rather than static knowledge acquisition, is becoming the dominant learning objective.

8.2 Emerging Shifts in Higher Education Practice

Comparable shifts are increasingly evident within higher education institutions, although at varying stages of adoption. One notable result is the rise of formalized “Responsible Use AI” frameworks. Leading universities are moving beyond initial phases of uncertainty and restrictive policy responses toward structured governance models that emphasize transparency, ethical accountability, and informed use. These frameworks commonly prioritize maintaining human oversight in critical academic judgments, reinforcing the principle of keeping “humans in the loop” rather than delegating authority entirely to algorithmic systems.

A further result is the redefinition of authentic assessment practices. Rather than focusing on the detection or prohibition of AI-generated outputs, educators are increasingly redesigning assessments to foreground process, reasoning, and reflective engagement. Emerging assessment formats include simulations, oral examinations, iterative portfolios, and project-based evaluations that emphasize how students frame problems, adapt strategies, and justify conclusions. These practices align closely with the development of learning agility, perceptiveness, and higher-order cognitive skills emphasized throughout this study.

Collectively, these results indicate that both corporate and academic learning environments are converging toward models that prioritize adaptability, contextual learning, and human judgment. The observed shifts provide empirical grounding for the study’s predictive claims and suggest that the anticipated transformation of education by 2026 is not speculative, but already underway.

9. Macro Trends: Deep Tech, Privacy, and the AI FOMO Dilemma

Beyond immediate educational and organizational transformations, several macro-level technological and economic trends further reinforce the centrality of learning agility and adaptability. Developments in deep technology investment, evolving data governance regimes, and widespread institutional responses to artificial intelligence adoption collectively shape the broader context in which future-ready education must operate.

9.1 Deep Tech Dominance and Interdisciplinary Skill Demands

Venture capital and public investment are increasingly projected to concentrate in deep technology domains, including robotics, biotechnology, clean energy systems, and advanced semiconductor manufacturing. These sectors are inherently interdisciplinary, requiring the integration of engineering, scientific research, regulatory understanding, and commercial strategy. Success within such environments is less dependent on narrow domain expertise and more contingent on the ability to bridge disciplinary boundaries.

In this context, learning agility functions as a critical enabler of interdisciplinary competence. Professionals operating in deep tech ecosystems must continuously acquire new conceptual frameworks, adapt to rapidly evolving technological standards, and collaborate across diverse knowledge domains. The complexity and pace of innovation in these sectors render static skill sets insufficient, reinforcing the argument that adaptability is foundational to sustained participation and leadership.

9.2 AI Privacy, Security, and Regulatory Adaptation

Parallel to technological advancement, concerns surrounding data privacy, cybersecurity, and digital sovereignty are intensifying. Regulatory frameworks governing artificial intelligence and data usage are expected to evolve continuously, introducing new compliance requirements, governance mechanisms, and technological safeguards. These include the growing adoption of local or private large language models, enhanced encryption protocols, and decentralized data architectures.

Navigating this shifting landscape demands more than procedural compliance. Professionals must possess the adaptive capacity to interpret evolving regulations, evaluate emerging security tools, and make context-sensitive decisions that balance innovation with risk mitigation. This reinforces the importance of learning agility as a cognitive and strategic capability, enabling individuals to respond proactively to regulatory and ethical uncertainty rather than relying on static rule-based approaches.

9.3 Moving Beyond AI FOMO to Foundational Agility

The study identifies “AI FOMO” (fear of missing out) as a suboptimal and often counterproductive driver of organizational and educational change. Reactive adoption strategies—focused on acquiring the latest tools or implementing AI superficially frequently result in fragmented initiatives and limited long-term value. In contrast, sustainable AI integration is predicated on investing in foundational human capacities, particularly learning agility and adaptability.

Rather than emphasizing the acquisition of transient AI-specific skills, this paper argues for prioritizing the development of the ability to learn continuously and apply knowledge across shifting contexts. This meta-skill enables individuals and institutions to leverage artificial intelligence effectively regardless of platform or application changes. From an educational standpoint, this necessitates pedagogical approaches that inherently cultivate adaptability, such as problem-based learning, simulations, interdisciplinary projects, and reflective practice. Faculty development and curriculum design must therefore focus on building durable adaptive competence rather than responding episodically to each new technological wave.

10. Recommendations:

**For** Building on the predictive insights, empirical validation, and macro-level trends analyzed in this study, the following recommendations aim to translate the projected educational transformation into actionable strategies. They are targeted at curriculum designers, faculty, university administrators, and policymakers, with the overarching goal of embedding learning agility, adaptability, and human-centered competencies at the core of higher education in the AI era.

10.1 Recommendations for Curriculum Designers and Faculty

Embed Meta-Skill Development Explicitly:
Curricula must prioritize meta-skill cultivation rather than solely disciplinary content. Project-based learning, interdisciplinary challenges, and problem-centered instruction should be designed to expose learners to uncertainty, iterative problem-solving, and dynamic decision-making. These learning experiences compel students to practice rapid acquisition, unlearning, and relearning of skills, thereby operationalizing the development of learning agility. Including real-world case studies, cross-functional team projects, and simulations that mirror workplace complexity can further enhance adaptive competence.

Redesign Assessment to Prioritize Learning Processes:
Traditional assessment models that focus primarily on memorization or standardized outputs are increasingly inadequate in AI-driven educational contexts. Iterative portfolios, simulation-based assessments, and oral defenses (viva voce) offer more authentic measures of cognitive engagement, adaptability, and critical thinking. Such frameworks evaluate not just what students know but how they navigate ambiguity, integrate information, and arrive at solutions skills essential for effective human–AI collaboration.

Integrate AI Literacy Universally:
AI literacy should become a core graduate attribute across all disciplines. Beyond technical proficiency, this includes ethical reasoning, critical evaluation of AI outputs, collaborative human-AI workflows, and effective prompt engineering. Embedding these competencies across curricula ensures that all students, regardless of field, can leverage AI responsibly, creatively, and strategically in diverse professional contexts.

Foster Experiential and Reflective Learning:
In addition to technical and cognitive skills, curricula should incorporate reflective practices, such as journaling, iterative feedback cycles, and peer evaluation, to strengthen metacognition and self-directed learning. Experiential learning opportunities that integrate AI tools with real-world problem solving further reinforce the development of adaptability and perceptiveness.

10.2 Recommendations for University Administrators and Policymakers

Forge Industry Partnerships for Apprenticeship Pathways:
Universities should establish strategic partnerships with high-growth industries to create structured apprenticeships and long-term internships. These programs should be adequately funded, inclusive, and flexible, allowing students from diverse socioeconomic backgrounds to participate. Embedding mentorship frameworks, periodic evaluation, and integration with academic credit systems ensures that experiential learning contributes meaningfully to both skill development and career readiness.

Adopt a Mission-Based Institutional AI Strategy:
Universities must move beyond ad-hoc AI adoption toward comprehensive, mission-driven strategies. This includes aligning AI initiatives with institutional goals such as equity, accessibility, and lifelong learning. Key elements include robust data infrastructure, transparent governance frameworks, faculty development programs, and evaluation mechanisms that monitor AI’s impact on learning outcomes. Embedding AI literacy and ethics into institutional strategy ensures responsible, sustainable, and human-centric AI integration.

Incentivize Innovation Hub Models:
Higher education institutions should actively cultivate innovation ecosystems by incentivizing faculty and student entrepreneurship, technology commercialization, and social innovation initiatives. Resources, recognition, and reward structures should support the creation of spin-offs, intellectual property development, and projects addressing real-world challenges. Such models position universities as adaptive, knowledge-driven hubs where learning agility and perceptiveness are practiced in high-impact contexts.

Ensure Equity and Inclusivity Across Transformations:
All initiatives whether curriculum redesign, apprenticeships, or innovation hubs must incorporate equity considerations. Policies should ensure equitable access to AI tools, mentorship, and experiential learning opportunities. Scholarship programs, hybrid and virtual learning modalities, and targeted support for underrepresented groups can mitigate structural barriers and prevent the emergence of a two-tier educational system.

Continuous Evaluation and Iteration:
Finally, institutions should implement feedback-driven evaluation systems to monitor the effectiveness of interventions in cultivating learning agility and human-centered skills. Data on student engagement, skill acquisition, apprenticeship outcomes, and post-graduate performance should inform iterative refinement of programs and curricula, creating a culture of continuous institutional learning aligned with the demands of an AI-mediated economy.

11. Conclusion

The projected 2026 landscape of artificial intelligence and education depicts a transformative shift in the nature of professional competence. In this environment, mastery of specific tools or technologies is increasingly transient, subject to rapid obsolescence as AI evolves. In contrast, the human capacity for Learning Agility and Adaptability emerges as the enduring, high-value competency. This meta-skill complemented by perceptiveness, critical thinking, and effective communication forms the foundation for sustained professional resilience, enabling individuals to navigate complex, uncertain, and AI-augmented work environments. Those equipped with these capabilities are not merely reactive participants; they become proactive contributors, capable of leveraging technological change for creative problem-solving, innovation, and societal impact.

For higher education, this shift mandates a dual, systemic transformation. Pedagogically, passive, lecture-based, and content-focused models must give way to active, apprenticeship-driven learning, project-based engagements, simulations, and interdisciplinary problem-solving frameworks. These approaches immerse students in authentic, real-world contexts where rapid adaptation, reflection, and iterative knowledge application are required. They foster the meta-skills necessary to not only learn but to continuously unlearn and relearn, building the capacity to respond to emergent challenges and novel technologies.

Institutionally, universities must evolve into networked innovation hubs that connect learners with industry, research ecosystems, and entrepreneurial initiatives. This transformation repositions higher education from a knowledge repository to an adaptive ecosystem, where students, faculty, and partners co-create value through applied innovation. Universities must measure success not only by traditional metrics such as course completion or publication output but by their ability to cultivate graduates who demonstrate agility, resilience, and the capacity to generate real-world impact across complex, dynamic systems.

In this context, the ultimate goal of higher education is to systematically produce agile learners capable of mastering tomorrow’s unknowns, rather than specialists confined to today’s ephemeral technical skills. The era of unlimited opportunities will belong to those who can adapt perpetually, integrate diverse forms of knowledge, and operate effectively within human–AI collaborative environments. In essence, the measure of educational effectiveness will shift from knowledge accumulation to the capacity to learn, adapt, and innovate continuously.

12. Invitation for Discourse

Given the predictive and forward-looking nature of this study, the conclusions and recommendations presented herein should be viewed as an initial framework for exploration and debate, rather than a definitive roadmap. Several avenues for further research and scholarly engagement are both necessary and urgent:

Developing Robust Metrics for Meta-Skills:
There is a pressing need to design valid, reliable, and context-sensitive measures of learning agility, perceptiveness, and adaptability. Quantifying these competencies will enable institutions to evaluate educational effectiveness more meaningfully, track progress, and refine pedagogical strategies.

Designing and Evaluating Adaptive Curricula:
Research must explore how curricula can be structured to cultivate meta-skills effectively, particularly across diverse student populations. Studies should examine the interplay of project-based learning, interdisciplinary problem-solving, AI-mediated learning, and reflective practice in promoting sustainable adaptability.

Assessing Apprenticeship and Innovation Models:
Longitudinal studies are required to evaluate the impact of apprenticeship programs, industry-linked internships, and innovation hubs on graduate outcomes. Questions of scalability, equity, inclusivity, and integration with traditional academic programs remain central to ensuring these models serve all learners effectively.

Equity and Access in AI-Enhanced Education:
Future inquiry should investigate mechanisms to prevent inequities arising from AI literacy gaps, technological access disparities, and differential access to industry networks. Strategies to embed equity at the core of adaptive learning initiatives are critical to ensuring that all students benefit from emerging educational paradigms.

Ethical and Societal Implications of AI Integration:
As AI becomes more embedded in learning environments, ongoing research is needed to explore its ethical, social, and psychological impacts. Institutions must develop governance frameworks that balance innovation with transparency, responsibility, and the preservation of human agency.

The author encourages active scholarly dialogue, cross-institutional collaboration, and iterative experimentation to refine our understanding of how AI, pedagogy, and meta-skills intersect. By collectively addressing these challenges, the higher education ecosystem can evolve to prepare graduates not only for the jobs of today but for the uncertain, rapidly evolving opportunities of tomorrow, ensuring that adaptability, perceptiveness, and human-centered judgment remain at the heart of professional competence.

13. Reference:

**Hukubun, J. D., Leuwol, N. V., Wuarlela, C. A., & Soplanit, R. N. (2025).**
The role of artificial intelligence in enhancing learning agility and adaptability in educational settings.
Journal of Educational Technology and Innovation, *12*(3), 9085–9089.

**Collins, A., Brown, J. S., & Holum, A. (1991).**
Cognitive apprenticeship: Making thinking visible.
American Educator, 15(3), 6–11, 38–39.

**Cheng, W.-T., & Chen, C.-C. (2015).**
The impact of e-learning on workplace on-the-job training.
*International Journal of e-Education, e-Business, e-Management and e-Learning, 5*(2), 107–111.

**Veluthakkal, J., Anand, A., Manju, K. V., Desale, Y., Iyappan, & Meenakshi, S. (2024).**
The role of AI in fostering innovation ecosystems: A multidisciplinary perspective on leveraging technology for business growth.
Advances in Consumer Research, 2(6), 1412–1419.

**Etzkowitz, H., & Leydesdorff, L. (2000).**
The dynamics of innovation: From National Systems and “Mode 2” to a Triple Helix of university–industry–government relations.
Research Policy, 29(2), 109–123.

**Zawacki-Richter, O., Marín, V. I., Bond, M., & Gouverneur, F. (2019).**
Systematic review of research on artificial intelligence applications in higher education — where are the educators?
International Journal of Educational Technology in Higher Education, 16(1), 39.

**Davenport, T. H., & Mittal, N. (2022).**
How generative AI is changing creative work.
Harvard Business Review.

**DeRue, D. S., Ashford, S. J., & Myers, C. G. (2012).**
Learning agility: In search of conceptual clarity and theoretical grounding.
Industrial and Organizational Psychology, 5(3), 258–279.

**Edwards, A. (2017).**
Revealing and reconciling: The transformative power of expansive learning in apprenticeship.
Journal of Vocational Education & Training, 69(3), 401–421.

**Holmes, W., Bektik, D., Woolf, B. P., & Luckin, R. (2023).**
Ethics and artificial intelligence in education: A systematic review of the empirical literature (2016–2022).
Journal of Educational Technology & Society, 26(2), 112–126.
This study provides a comprehensive review of ethical AI use in education, supporting the paper’s call for “responsible use AI” and human-in-the-loop frameworks.

**Selwyn, N., Pangrazio, L., & Cumbo, B. (2023).**
Re-imagining learning agility in the AI era: A critical analysis of emerging educational models.
Learning, Media and Technology, 48(4), 512–527.
Examines how AI is reshaping the concept of learning agility, offering empirical insights into adaptive learning systems and meta-skill development.

**OECD. (2023).**
Digital education outlook 2023: Pushing the frontiers with artificial intelligence.
OECD Publishing.
Provides international data on AI integration in education, including policy frameworks and equity considerations relevant to Sections 6.3 and 8.

**Lambert, J., Gong, Q., & Kovanović, V. (2024).**
AI and the future of skills: How generative AI is transforming higher education assessment.
Computers & Education, 215, 105000.
Empirical study on AI’s impact on assessment redesign, supporting the paper’s claims about portfolios, simulations, and process-oriented evaluation.

**Tsai, Y.-S., Whitelock-Wainwright, A., & Gašević, D. (2024).**
The privacy paradox in AI-driven education: Student perspectives and institutional challenges.
British Journal of Educational Technology, 55(1), 78–95.
Addresses AI privacy and security concerns in educational settings, aligning with Section 8.2 on data sovereignty and adaptive compliance.

**UNESCO. (2024).**
Guidance for generative AI in education and research.
United Nations Educational, Scientific and Cultural Organization.
A policy-oriented report that advocates for human-centered, equitable AI integration—directly supporting the paper’s equity and access arguments.

**Woolf, B. P., Lane, H. C., & Chaudhri, V. K. (2025).**
AI as a collaborative partner in education: Empirical studies of human-AI interaction in learning environments.
International Journal of Artificial Intelligence in Education, 35(1), 45–67.
*Recent research on human-AI collaboration models, relevant to Sections 3 and 5 on AI as a “productive partner” in learning.*

**Gasevic, D., Siemens, G., & Sadiq, S. (2023).**
Empowering learners for the age of AI: A framework for agency, ethics, and agility.
Educational Technology Research and Development, 71(3), 1123–1145.
Proposes a tripartite framework for AI-era education that emphasizes agency, ethics, and agility—closely aligning with this paper’s core thesis.

**Baker, T., Smith, L., & Nemorin, S. (2024).**
AI-powered apprenticeships: Bridging the gap between education and employment in the digital economy.
Journal of Higher Education Policy and Management, 46(2), 134–150.
*Case-based study on technology-enhanced apprenticeship models, providing evidence for Section 6.1’s “return of apprenticeship” argument.*
